# Supplementary material for: Taxonomic composition and functional potentials of gastrointestinal microbiota in 12 wild-stranded cetaceans
Source: PubMed Central journal article supplement (PMC11390675; doi:10.3389/fmicb.2024.1394745), 2024-08-29
Supplement: Data_Sheet_1.pdf [file Data_Sheet_1.pdf]

## Supplementary Information

### Supplementary Note 1

#### Eukaryotic sequencing and data analysis of two dolphin species

Amplification of the 18S rDNA V4 region was conducted by using the eukaryotic primers 528F-706R (528F: GCGGTAATTCCAGCTCCAA, 706R: AATCCRAGAATTTTCACCTCT) for the four gastrointestinal samples from rough-toothed dolphin and five samples from the short-finned pilot whale (**Table 1**). The amplification, sequencing strategy and sequencing data processes were the same as for the 16S rDNA gene amplicon sequencing described previously. Furthermore, the clean tags were clustered into operational taxonomic units (OTUs) using the USEARCH “-cluster\_otus” command and then generated the OTU abundance profile using the “--usearch\_global” command with sequence identity  $\geq 0.97$ . After removing the chimeric OTUs, the OTU representative sequences were taxonomically classified using the syntax algorithm against the PR2 database (v4.12.0) with a confidence threshold of 0.8. Besides, the mitochondrial 12S rDNA primers MiFish-F (GTCGGTAAACTCGTGCCAGC) and MiFish-R (CATAGTGGGGTATCTAATCCCAGTTTG) were performed to identify fish species that occurred in the gastrointestinal tract samples as previously described. Briefly, the 12S rDNA amplicon libraries were sequenced on the BGISEQ-500 platform with a 150 bp paired-end model. The clean tags were clustered to OTUs with a 97% threshold, and then taxonomically annotated against the non-redundant nucleotide (nt) database and the MitoFish database using BLAST+ (v2.2.6).

## Supplementary Figures

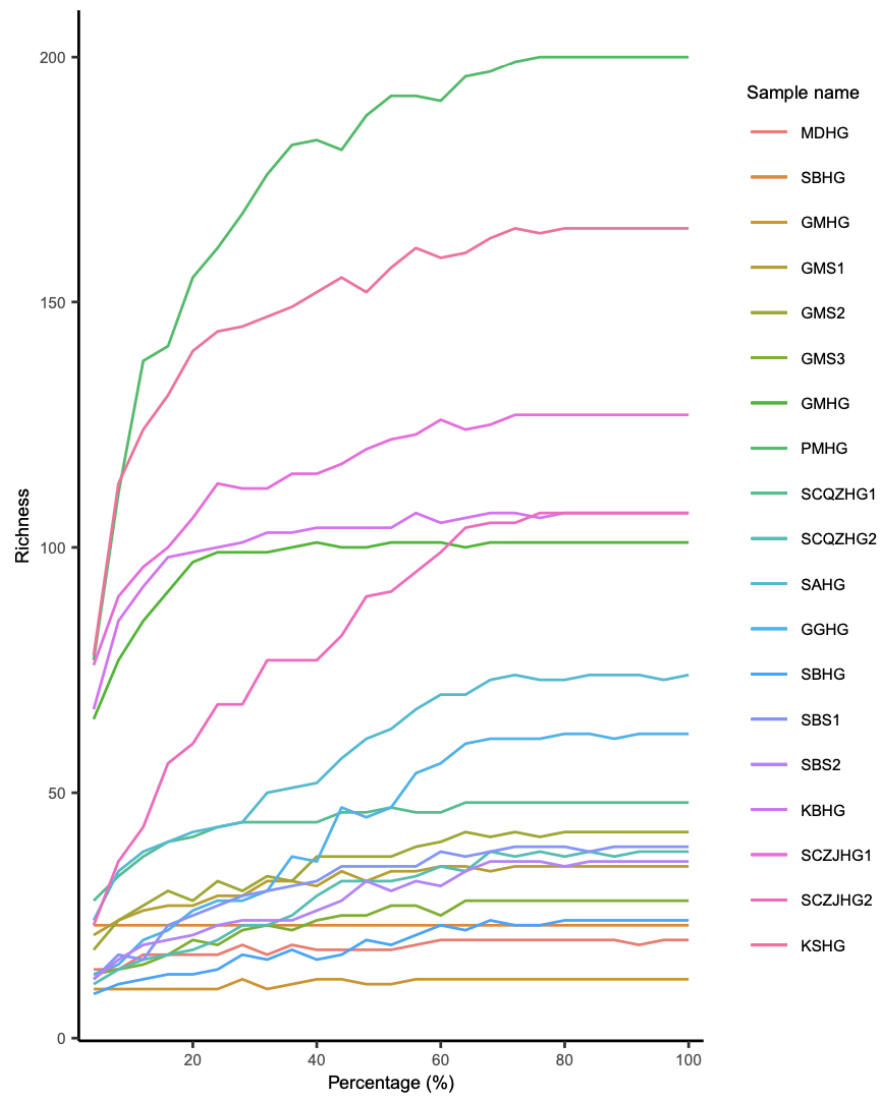

**Figure S1. The rarefaction curve of all sample sequences.**

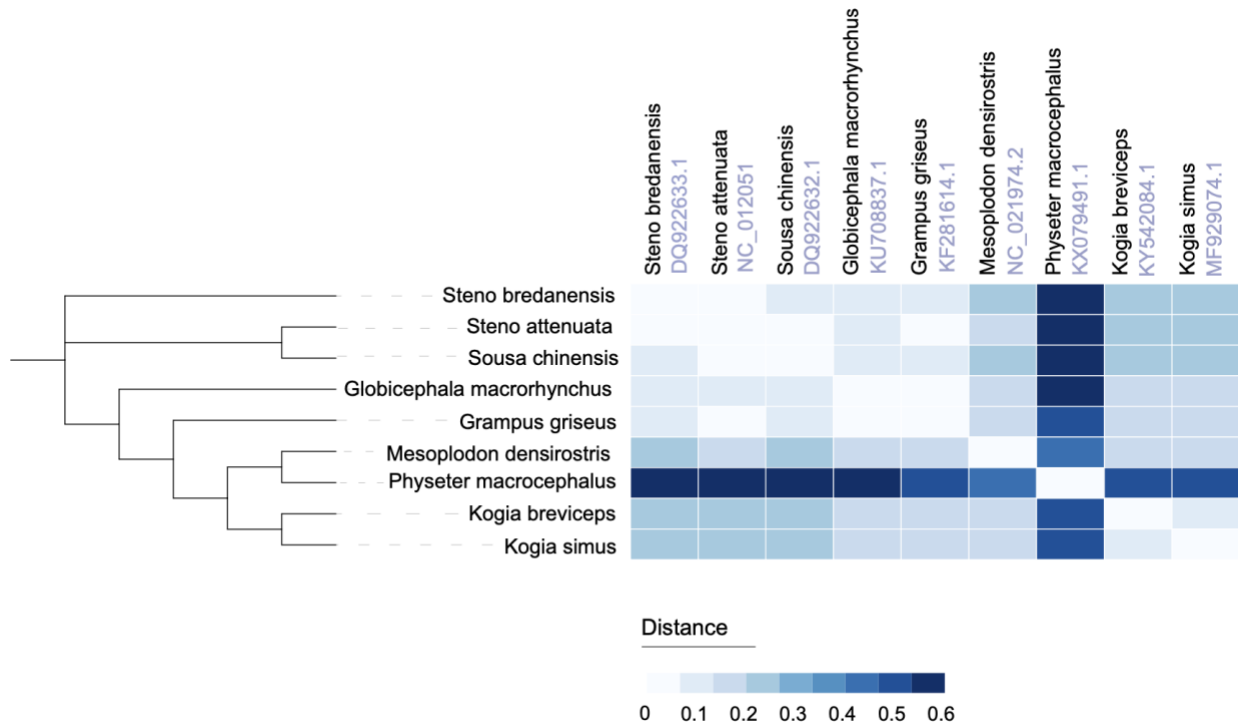

**Figure S2. The phylogenetic tree (left) and evolutionary distance heatmap (right) of nine cetacean species based on the COI genes.**

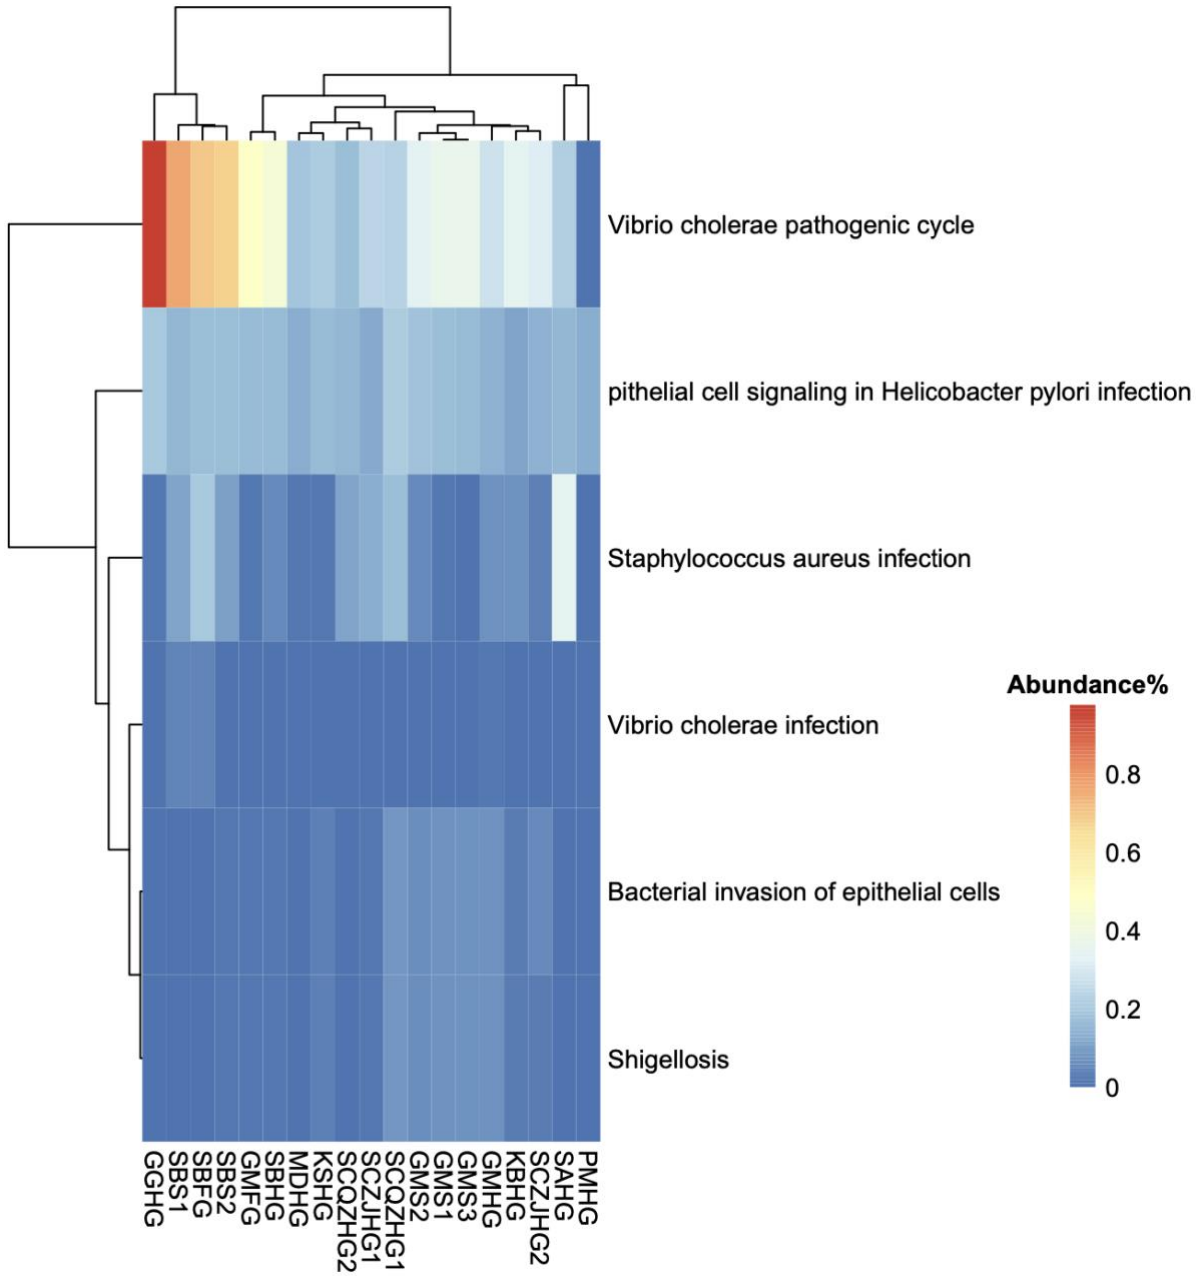

**Figure S3. Relative abundance of the KEGG pathways related to pathogenic infection.**

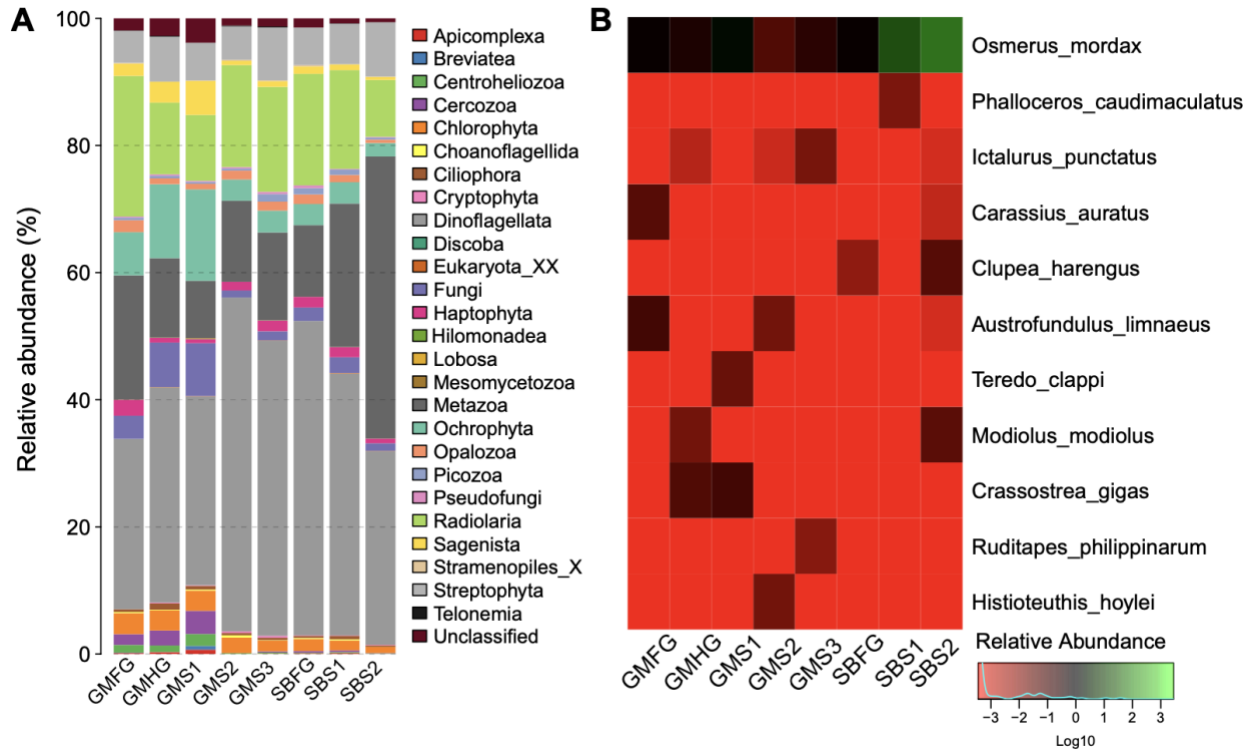

**Figure S4. Eukaryotic community composition of the GM and SB gastrointestinal tract samples.**

(A) Eukaryotic relative abundance at phylum level by using 18S rDNA amplicon sequencing. We identified a total of 26 eukaryotic phyla and found Dinoflagellata was the most dominant species (average = 38.79%), followed by Metazoa, Radiolaria, Streptophyta, Ochrophyta and Fungi with an average relative abundance of 18.22%, 14.78%, 6.55%, 6.05% and 3.41% across samples, respectively. The relative abundance of Dinoflagellata was significantly higher in the stomach samples of GM than that in the gut samples, whereas the relative abundance of Ochrophyta and Fungi was significantly lower in the stomach samples of GM than that in the gut samples, but Dinoflagellata was significantly lower in the stomach samples of SB than that in the gut sample.

(B) Heatmap of the relative abundances of the fish, mollush and cephalopod species for the gastrointestinal tract samples. We identified a variety of fish among all samples, including rainbow smelt (*Osmerus mordax*), dusky millions fish (*Phalloceros caudimaculatus*), channel catfish (*Ictalurus punctatus*), goldfish (*Carassius auratus*), Atlantic herring (*Clupea harengus*), and *Austrofundulus limnaeus*. And we also detected some mollush species in the two delphinids and the cephalopod species *Histioteuthis hoylei* in the short-finned pilot.

## Supplementary Tables

**Table S2. Sample sequencing details in this study.**

| #SampleID | Paired_Clean_reads | Connect_tags | Clean_tags | ZOTUs |
|-----------|--------------------|--------------|------------|-------|
| MDHG      | 99,612             | 95,413       | 94,428     | 38    |
| PMHG      | 118,125            | 111,463      | 93,793     | 242   |
| SCQZHG1   | 109,153            | 95,162       | 92,907     | 73    |
| SCQZHG2   | 105,183            | 10,882       | 99,700     | 104   |
| SAHG      | 93,859             | 90,765       | 89,086     | 163   |
| GGHG      | 101,083            | 98,509       | 96,459     | 176   |
| KBHG      | 13,964             | 13,472       | 5,508      | 106   |
| SCZJHG1   | 9,056              | 8,621        | 8,194      | 125   |
| SCZJHG2   | 94,870             | 90,943       | 88,360     | 156   |
| KSHG      | 95,732             | 90,332       | 86,567     | 200   |
| SBHG      | 19,112             | 17,113       | 11,797     | 23    |
| GMHG      | 5,119              | 4,742        | 4,509      | 97    |
| GMFG      | 95,420             | 92,971       | 90,500     | 34    |
| GMS1      | 95,361             | 92,505       | 89,592     | 63    |
| GMS2      | 95,902             | 93,149       | 90,094     | 58    |
| GMS3      | 96,207             | 93,329       | 90,652     | 49    |
| SBFG      | 21,500             | 19,716       | 18,773     | 63    |
| SBS1      | 25,121             | 24,209       | 23,578     | 83    |
| SBS2      | 25,692             | 24,616       | 23,659     | 78    |

**Table S3. The significantly different KEGG pathways detected by using edgeR.**

| Kegg Pathway                             | P- Value | Enriched group           | MDH G | KBH G | KSH G | PMH G | GMH G | SCQZ HG1 | SCQZ HG2 | SCZJ HG1 | SCZJ HG2 | SAH G | GGH G | SBH G |
|------------------------------------------|----------|--------------------------|-------|-------|-------|-------|-------|----------|----------|----------|----------|-------|-------|-------|
| Other glycan degradation                 | 5.85E-05 | physeteroids and ziphiid | 5.78  | 0.15  | 0.82  | 1.72  | 0.43  | 0.58     | 0.20     | 0.61     | 0.23     | 0.19  | 0.39  | 0.38  |
| Glycosaminoglycan degradation            | 2.62E-04 | physeteroids and ziphiid | 2.98  | 0.02  | 0.21  | 0.41  | 0.10  | 0.07     | 0.01     | 0.09     | 0.07     | 0.02  | 0.23  | 0.11  |
| Phosphotransferase system (PTS)          | 3.16E-04 | delphinids               | 0.19  | 0.55  | 0.66  | 0.11  | 0.75  | 1.46     | 1.38     | 1.40     | 0.94     | 1.12  | 1.06  | 0.74  |
| Histidine metabolism                     | 8.32E-04 | physeteroids and ziphiid | 1.26  | 1.10  | 1.29  | 1.43  | 0.88  | 1.15     | 1.00     | 1.09     | 0.97     | 0.86  | 1.09  | 0.89  |
| Glycine, serine and threonine metabolism | 3.67E-3  | physeteroids and ziphiid | 0.99  | 1.32  | 1.16  | 1.22  | 1.04  | 0.82     | 0.71     | 0.96     | 0.89     | 0.96  | 1.05  | 1.05  |
| Glyoxylate and dicarboxylate metabolism  | 9.15E-3  | physeteroids and ziphiid | 0.66  | 1.01  | 0.65  | 0.64  | 0.62  | 0.50     | 0.32     | 0.52     | 0.48     | 0.40  | 0.67  | 0.58  |
| Citrate cycle (TCA cycle)                | 9.95E-3  | physeteroids and ziphiid | 1.17  | 0.99  | 0.85  | 1.55  | 0.99  | 0.66     | 0.67     | 0.67     | 0.76     | 1.03  | 0.92  | 1.04  |
| Sphingolipid metabolism                  | 1.14E-02 | physeteroids and ziphiid | 1.01  | 0.10  | 0.25  | 0.40  | 0.14  | 0.20     | 0        | 0.28     | 0.05     | 0.03  | 0.15  | 0.07  |
| D-Alanine metabolism                     | 1.20E-02 | delphinids               | 1.26  | 1.33  | 1.75  | 1.43  | 1.82  | 2.12     | 2.10     | 1.79     | 1.85     | 2.67  | 1.49  | 1.86  |
| Glycerophospholipid metabolism           | 1.31E-02 | delphinids               | 0.38  | 0.62  | 0.62  | 0.42  | 0.65  | 0.76     | 0.73     | 0.67     | 0.72     | 0.74  | 0.71  | 0.66  |

**Table S4. Relative abundance of 24 zOTUS assigned to “animal\_parasites\_or\_symbionts” and “human\_pathogens\_all”.**

| #ZOTUID | MDHG | KBH<br>G | KSHG        | PMHG        | GMHG  | SCQZHG<br>1 | SCQZHG<br>2 | SCZJHG<br>1 | SCZJHG2     | SAHG        | GGHG        | SBH<br>G | Taxonomy        | Group                                                |
|---------|------|----------|-------------|-------------|-------|-------------|-------------|-------------|-------------|-------------|-------------|----------|-----------------|------------------------------------------------------|
| ZOTU4   | 0    | 0.47     | 8.07        | 0           | 17.80 | 21.71       | 8.02E-<br>3 | 3.86        | 4.76        | 0.46        | 1.03E-<br>3 | 2.42     | Escherichia     | animal_parasites_or_symbionts<br>human_pathogens_all |
| ZOTU58  | 0    | 0        | 0.01        | 0           | 0.08  | 0           | 0           | 0           | 0           | 2.90        | 4.12E-<br>3 | 0        | Actinobacillus  | animal_parasites_or_symbionts                        |
| ZOTU118 | 0    | 0        | 0           | 0           | 0     | 0           | 0.59        | 0.02        | 0           | 0           | 5.15E-<br>3 | 0        | Actinobacillus  | animal_parasites_or_symbionts                        |
| ZOTU184 | 0    | 0.67     | 0           | 0           | 0.11  | 0           | 2.01E-<br>3 | 3.60        | 0.02        | 0           | 6.18E-<br>3 | 0        | Prevotella      | animal_parasites_or_symbionts                        |
| ZOTU255 | 0    | 0.59     | 1.14E-<br>3 | 1.05E-<br>3 | 0.38  | 0           | 6.02E-<br>3 | 1.92        | 7.42E-<br>3 | 2.24E-<br>3 | 1.03E-<br>3 | 0        | Actinobacillus  | animal_parasites_or_symbionts                        |
| ZOTU266 | 0    | 0.47     | 0           | 0           | 0.19  | 0           | 4.01E-<br>3 | 1.77        | 0.01        | 1.12E-<br>3 | 0           | 0        | Actinobacillus  | animal_parasites_or_symbionts                        |
| ZOTU259 | 0    | 0        | 0           | 1.05E-<br>3 | 0.11  | 0           | 1.00E-<br>3 | 2.09        | 0           | 1.12E-<br>3 | 1.03E-<br>3 | 0        | Prevotella      | animal_parasites_or_symbionts                        |
| ZOTU358 | 0    | 0.43     | 0           | 0           | 0.38  | 0           | 7.02E-<br>3 | 0.74        | 1.06E-<br>3 | 3.37E-<br>3 | 1.03E-<br>3 | 0        | Pasteurellaceae | animal_parasites_or_symbionts                        |
| ZOTU506 | 0    | 0.06     | 0           | 0           | 0     | 0           | 1.00E-<br>3 | 1.25        | 0           | 0           | 1.03E-<br>3 | 0        | Roseburia       | animal_parasites_or_symbionts                        |
| ZOTU305 | 0    | 0.08     | 0           | 0           | 0.11  | 0           | 0           | 0.83        | 7.42E-<br>3 | 0           | 2.06E-<br>3 | 0        | Prevotella      | animal_parasites_or_symbionts                        |
| ZOTU399 | 0    | 0        | 0           | 0           | 0     | 0           | 0           | 1.01        | 1.06E-<br>3 | 1.12E-<br>3 | 0           | 0        | Prevotella      | animal_parasites_or_symbionts                        |
| ZOTU419 | 0    | 0.53     | 0           | 0           | 0.08  | 0           | 2.01E-<br>3 | 0.41        | 2.12E-<br>3 | 2.24E-<br>3 | 1.03E-<br>3 | 0        | Campylobacter   | animal_parasites_or_symbionts                        |
| ZOTU481 | 0    | 0.14     | 0           | 0           | 0     | 0           | 0           | 0.60        | 1.06E-<br>3 | 0           | 4.12E-<br>3 | 0        | Prevotella      | animal_parasites_or_symbionts                        |
| ZOTU400 | 0    | 0        | 0           | 0           | 0.08  | 0           | 0           | 0.72        | 0           | 0           | 0           | 0        | Prevotella      | animal_parasites_or_symbionts                        |
| ZOTU407 | 0    | 0.08     | 0           | 0           | 0     | 0           | 0           | 0.66        | 0           | 0           | 0           | 0        | Prevotella      | animal_parasites_or_symbionts                        |
| ZOTU490 | 0    | 0.22     | 0           | 0           | 0.11  | 0           | 0           | 0.39        | 3.18E-<br>3 | 0           | 1.03E-<br>3 | 0        | Pasteurellaceae | animal_parasites_or_symbionts                        |
| ZOTU444 | 0    | 0.06     | 0           | 0           | 0     | 0           | 0           | 0.41        | 0           | 0           | 1.03E-<br>3 | 0        | Prevotella      | animal_parasites_or_symbionts                        |
| ZOTU555 | 0    | 0        | 0           | 0           | 0     | 0           | 0           | 0.44        | 0           | 0           | 0           | 0        | Prevotella      | animal_parasites_or_symbionts                        |
| ZOTU616 | 0    | 0        | 0           | 0           | 0     | 0           | 0           | 0.39        | 0           | 0           | 1.03E-<br>3 | 0        | Prevotella      | animal_parasites_or_symbionts                        |



|         |   |      |   |   |      |   |         |      |         |         |   |   |                  |                                                      |
|---------|---|------|---|---|------|---|---------|------|---------|---------|---|---|------------------|------------------------------------------------------|
| ZOTU497 | 0 | 0.14 | 0 | 0 | 0.08 | 0 | 2.01E-3 | 0.09 | 7.42E-3 | 0       | 0 | 0 | Pasteurellaceae  | animal_parasites_or_symbionts                        |
| ZOTU552 | 0 | 0.10 | 0 | 0 | 0    | 0 | 0       | 0.30 | 0       | 0       | 0 | 0 | Prevotella       | animal_parasites_or_symbionts                        |
| ZOTU613 | 0 | 0.14 | 0 | 0 | 0    | 0 | 1.00E-3 | 0    | 0.01    | 1.12E-3 | 0 | 0 | Stenotrophomonas | animal_parasites_or_symbionts<br>human_pathogens_all |
| ZOTU619 | 0 | 0    | 0 | 0 | 0    | 0 | 0       | 0.32 | 0       | 0       | 0 | 0 | Prevotella       | animal_parasites_or_symbionts                        |
| ZOTU617 | 0 | 0    | 0 | 0 | 0    | 0 | 0       | 0.24 | 0       | 0       | 0 | 0 | Prevotella       | animal_parasites_or_symbionts                        |

**Table S5. Summary of operational taxonomic unit (OTU) annotations for the 12S rDNA amplicon of two dolphin species.**

| #OTU_ID | GMFG | GMIF | GMS1 | GMS2 | GMS3 | SBS1 | SBS2 | SBFG | Taxonomy                                                                                       |
|---------|------|------|------|------|------|------|------|------|------------------------------------------------------------------------------------------------|
| Otu0034 | 795  | 0    | 0    | 0    | 0    | 0    | 0    | 0    | Metazoa; Chordata; Actinopteri; Perciformes; Cottidae; Trachidermus; Trachidermus_fasciatus    |
| Otu0046 | 0    | 0    | 0    | 0    | 0    | 118  | 134  | 0    | Metazoa; Chordata; Actinopteri; Clupeiformes; Clupeidae; Clupea; Clupea_pallasii               |
| Otu0053 | 0    | 0    | 0    | 0    | 0    | 30   | 171  | 0    | Metazoa; Chordata; Actinopteri; Osmeriformes; Salangidae; Mallotus; Mallotus_villosus          |
| Otu0092 | 0    | 0    | 0    | 0    | 0    | 0    | 0    | 10   | Metazoa; Chordata; Actinopteri; Perciformes; Sebastidae; Sebastiscus; Sebastiscus_marmoratus   |
| Otu0095 | 10   | 5    | 0    | 1    | 7    | 10   | 7    | 6    | Metazoa; Chordata; Actinopteri; Siluriformes; Auchenipteridae; Tatia; Tatia_intermedia         |
| Otu0101 | 0    | 0    | 0    | 8    | 0    | 0    | 0    | 10   | Metazoa; Chordata; Actinopteri; Tetraodontiformes; Tetraodontidae; Takifugu; Takifugu_obscurus |
| Otu0113 | 0    | 0    | 6    | 0    | 0    | 0    | 0    | 0    | Metazoa; Chordata; Actinopteri; Cypriniformes; Danionidae; Danio; Danio_rerio                  |
